# Supplementary material for: Efficient luminescence sensing in two lanthanide metal–organic frameworks with rich uncoordinated Lewis basic sites
Source: Royal Society of Chemistry journal article supplement (doi:10.1039/d1ce00923k), 2021-01-01
Supplement: d1ce00923k1.pdf [file d1ce00923k1.pdf]

## Supporting Information

### Efficient luminescence sensing in two lanthanide metal-organic frameworks with rich uncoordinated Lewis basic sites

Liming Deng,<sup>a,b</sup> Huihui Zhao,<sup>a</sup> Kang Liu,<sup>a</sup> and Dingxuan Ma,<sup>\*a</sup>

<sup>a</sup> Taishan Scholar Advantage and Characteristic Discipline Team of Eco Chemical Process and Technology, Key Laboratory of Eco-chemical Engineering, Qingdao University of Science and Technology, Qingdao 266042, P. R. China.

<sup>b</sup> Jiangsu Key Laboratory of Electrochemical Energy Storage Technologies, College of Materials Science and Technology, Nanjing University of Aeronautics and Astronautics, Nanjing 210016, P.R. China

\* Corresponding author.

E-mail addresses: madingxuan640@126.com (D.X. Ma).

**Table S1.** Crystal data and structure refinement of **Eu-DTA** and **Tb-DTA**.

|                                                   | <b>Eu-DTA</b>                                                                    | <b>Tb-DTA</b>                                                               |
|---------------------------------------------------|----------------------------------------------------------------------------------|-----------------------------------------------------------------------------|
| Chemical formula                                  | $\{[\text{Eu}(\text{DTA})_{1.5}(\text{H}_2\text{O})]\cdot\text{H}_2\text{O}\}_n$ | $[\text{Tb}(\text{DTA})(\text{C}_2\text{O}_4)_{0.5}(\text{H}_2\text{O})]_n$ |
| Empirical formula                                 | $\text{C}_{21}\text{H}_{15}\text{N}_6\text{O}_8\text{Eu}$                        | $\text{C}_{15}\text{H}_{10}\text{N}_4\text{O}_7\text{Tb}$                   |
| Formula weight                                    | 631.35                                                                           | 517.19                                                                      |
| $T$ (K)                                           | 293(2)                                                                           | 293(2)                                                                      |
| Crystal system                                    | triclinic                                                                        | triclinic                                                                   |
| Space group                                       | <i>P</i> Error!                                                                  | <i>P</i> Error!                                                             |
| $a$ (Å)                                           | 9.9901(8)                                                                        | 8.2132(5)                                                                   |
| $b$ (Å)                                           | 10.1477(7)                                                                       | 9.9550(7)                                                                   |
| $c$ (Å)                                           | 11.9438(9)                                                                       | 11.4034(6)                                                                  |
| $\alpha$ (°)                                      | 64.998(7)                                                                        | 101.681(5)                                                                  |
| $\beta$ (°)                                       | 76.806(7)                                                                        | 102.242(5)                                                                  |
| $\gamma$ (°)                                      | 82.831(6)                                                                        | 107.250(6)                                                                  |
| $V$ (Å <sup>3</sup> )                             | 1067.85(15)                                                                      | 834.27(10)                                                                  |
| $Z$                                               | 2                                                                                | 2                                                                           |
| $D_c$ (mg·mm <sup>-3</sup> )                      | 1.964                                                                            | 2.059                                                                       |
| $\mu$ (mm <sup>-1</sup> )                         | 3.002                                                                            | 4.287                                                                       |
| $F(000)$                                          | 620.0                                                                            | 498.0                                                                       |
| Index ranges (h, k, l)                            | -13/13, -13/14, -16 /14                                                          | -9/9, -10/11, -13 /12                                                       |
| Reflections collected                             | 8795                                                                             | 5814                                                                        |
| R(int)                                            | 0.0482                                                                           | 0.0343                                                                      |
| Data/Restraints/Parameters                        | 5152/0/329                                                                       | 2945/0/249                                                                  |
| GOF ( $F^2$ )                                     | 0.976                                                                            | 1.076                                                                       |
| $R_I, wR_2 [I \geq 2\sigma(I)]$                   | 0.0364, 0.0696                                                                   | 0.0322, 0.0716                                                              |
| $R_I, wR_2$ (all data)                            | 0.0460, 0.0739                                                                   | 0.0382, 0.0751                                                              |
| Largest diff. peak and hole/ e<br>Å <sup>-3</sup> | 1.43/-1.09                                                                       | 1.20/-0.81                                                                  |

$$R_I = \frac{\sum ||F_o| - |F_c||}{\sum |F_o|} . wR_2 = [\sum w(|F_o|^2 - |F_c|^2)^2 / \sum w|F_o|^2]^2]^{1/2} .$$

**Table S2.** Selected bond lengths (Å) and angles (°) for **Eu-DTA** and **Tb-DTA**.

| <b>Eu-DTA</b> |            |           |            |
|---------------|------------|-----------|------------|
| Eu1-O1        | 2.475(3)   | Eu1-O5    | 2.334(3)   |
| Eu1-O2        | 2.395(2)   | Eu1-O6    | 2.542(3)   |
| Eu1-O3        | 2.359(3)   | Eu1-O7    | 2.443(3)   |
| Eu1-O4        | 2.379(3)   | Eu1-N1    | 2.508(4)   |
| O1-Eu1-O6     | 129.91(10) | O4-Eu1-O1 | 79.84(11)  |
| O1-Eu1-N1     | 72.29(12)  | O4-Eu1-O2 | 154.63(11) |
| O2-Eu1-O1     | 87.34(10)  | O4-Eu1-O6 | 80.24(10)  |
| O2-Eu1-O6     | 124.18(9)  | O4-Eu1-O7 | 131.82(11) |
| O2-Eu1-O7     | 71.89(10)  | O4-Eu1-N1 | 77.90(11)  |
| O2-Eu1-N1     | 77.38(10)  | O5-Eu1-O1 | 68.83(12)  |
| O3-Eu1-O1     | 144.27(11) | O5-Eu1-O2 | 96.19(10)  |
| O3-Eu1-O2     | 97.49(10)  | O5-Eu1-O3 | 144.53(12) |
| O3-Eu1-O4     | 81.14(10)  | O5-Eu1-O4 | 99.38(10)  |
| O3-Eu1-O6     | 75.40(10)  | O5-Eu1-O6 | 69.83(11)  |
| O3-Eu1-O7     | 79.50(11)  | O5-Eu1-O7 | 73.96(11)  |
| O3-Eu1-N1     | 74.31(12)  | O5-Eu1-N1 | 140.84(13) |
| O7-Eu1-O1     | 134.80(11) | O7-Eu1-N1 | 136.17(10) |
| O7-Eu1-O6     | 52.30(9)   | N1-Eu1-O6 | 144.86(11) |

  

| <b>Tb-DTA</b> |            |           |            |
|---------------|------------|-----------|------------|
| Tb1-O1        | 2.390(4)   | Tb1-O5    | 2.447(4)   |
| Tb1-O2        | 2.235(4)   | Tb1-O6    | 2.375(4)   |
| Tb1-O3        | 2.379(4)   | Tb1-N1    | 2.550(5)   |
| Tb1-O4        | 2.455(4)   | Tb1-N2    | 2.497(4)   |
| O1-Tb1-O4     | 133.82(14) | O3-Tb1-O1 | 67.47(14)  |
| O1-Tb1-O5     | 124.82(14) | O3-Tb1-O4 | 71.51(13)  |
| O1-Tb1-N1     | 70.93(15)  | O3-Tb1-O5 | 69.16(14)  |
| O1-Tb1-N2     | 77.40(15)  | O3-Tb1-N1 | 138.23(14) |
| O2-Tb1-O1     | 86.72(15)  | O3-Tb1-N2 | 93.02(17)  |
| O2-Tb1-O3     | 96.92(18)  | O4-Tb1-N1 | 143.03(14) |
| O2-Tb1-O4     | 77.93(14)  | O4-Tb1-N2 | 125.62(14) |
| O2-Tb1-O5     | 131.07(14) | O5-Tb1-O4 | 53.15(12)  |

|           |            |           |            |
|-----------|------------|-----------|------------|
| O2-Tb1-O6 | 99.30(16)  | O5-Tb1-N1 | 143.77(14) |
| O2-Tb1-N1 | 76.95(16)  | O5-Tb1-N2 | 72.51(14)  |
| O2-Tb1-N2 | 156.40(16) | O6-Tb1-O5 | 73.83(15)  |
| O6-Tb1-O1 | 147.90(16) | O6-Tb1-N1 | 79.73(16)  |
| O6-Tb1-O3 | 141.47(15) | O6-Tb1-N2 | 85.78(15)  |
| O6-Tb1-O4 | 78.06(14)  | N2-Tb1-N1 | 81.37(16)  |

---

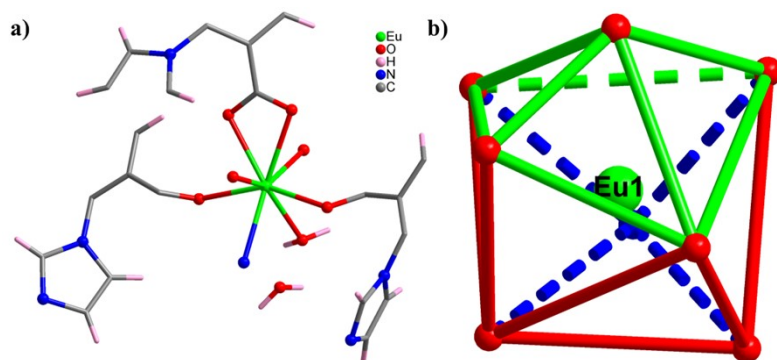

**Fig. S1.** a) Asymmetric structural unit of Eu-DTA; b) dodecahedral geometry of Eu<sup>3+</sup> in Eu-DTA.

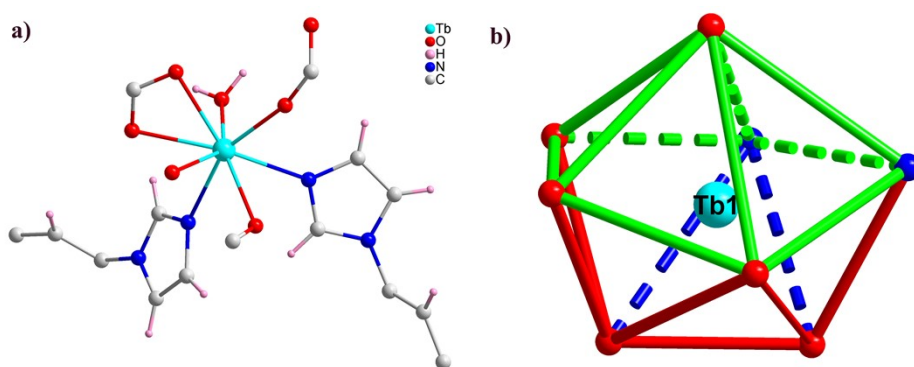

**Fig. S2.** a) Asymmetric structural unit of Tb-DTA; b) twisted double triangular prism geometry of Tb<sup>3+</sup> in Tb-DTA.

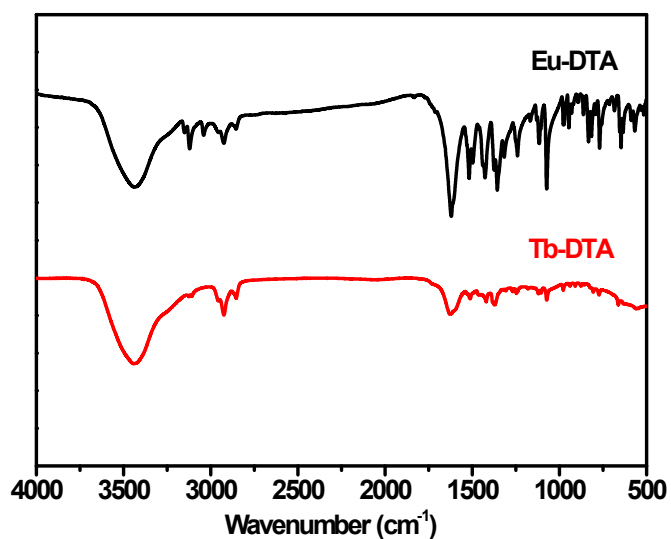

**Fig. S3.** IR spectra of Eu-DTA and Tb-DTA.

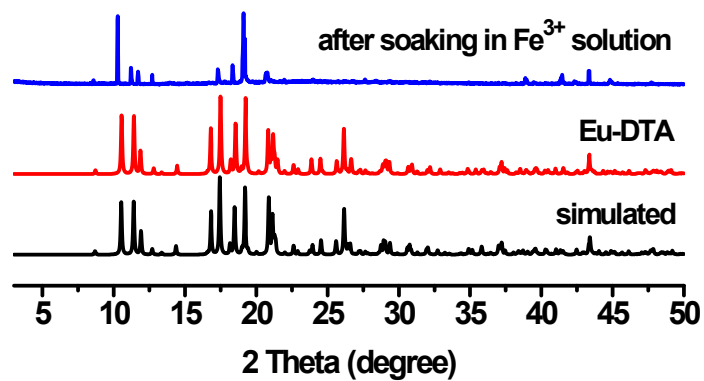

Fig. S4. Powder X-ray diffraction patterns of Eu-DTA.

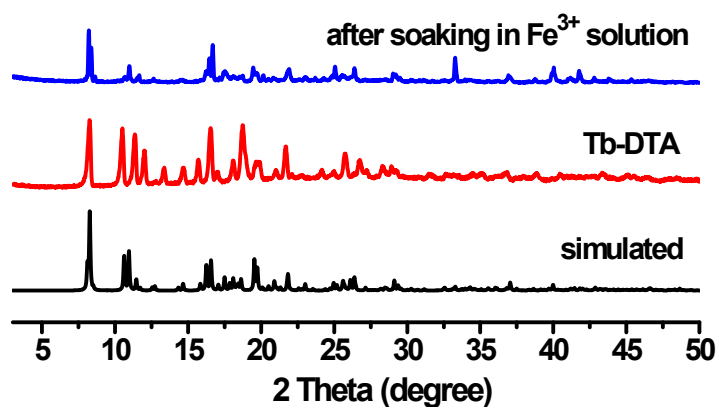

Fig. S5. Powder X-ray diffraction patterns of Tb-DTA.

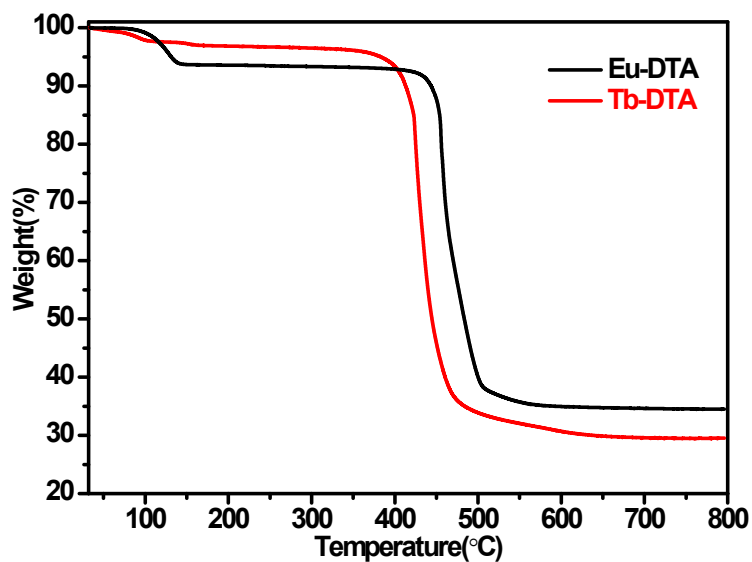

Fig. S6. TGA curves of Eu-DTA and Tb-DTA under N<sub>2</sub> atmosphere.

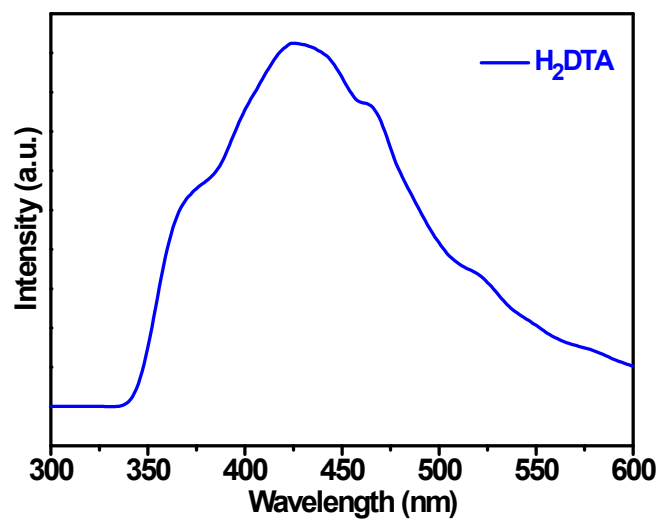

**Fig. S7.** Solid state emission spectra of H<sub>2</sub>DTA.

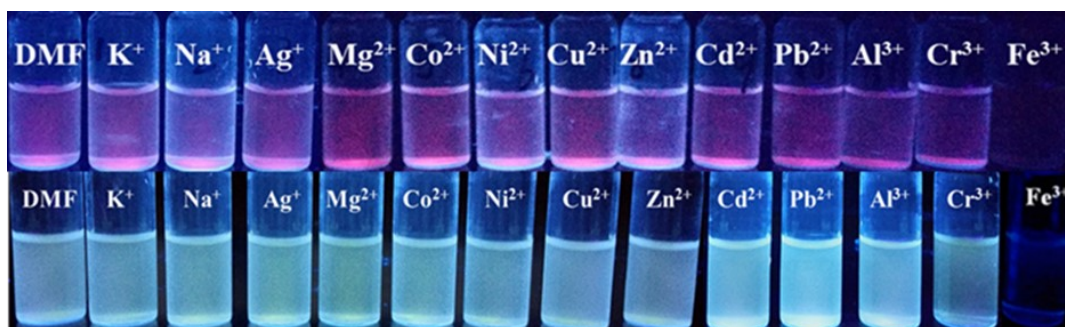

**Fig. S8.** Photographs showing color changes after adding metal ions under 360 nm ultraviolet light (up: Eu-DTA; down: Tb-DTA)

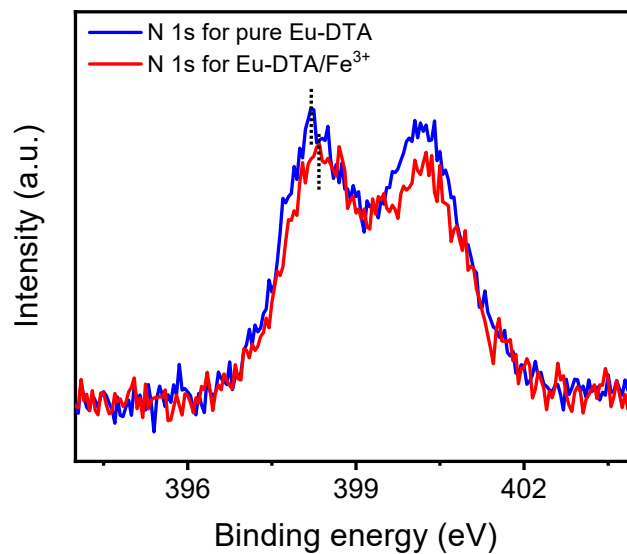

**Fig. S9.** N 1s spectra of the Eu-DTA (blue) and Fe<sup>3+</sup>-incorporated 1 (red) activated in DMF solution of Fe(NO<sub>3</sub>)<sub>3</sub>.

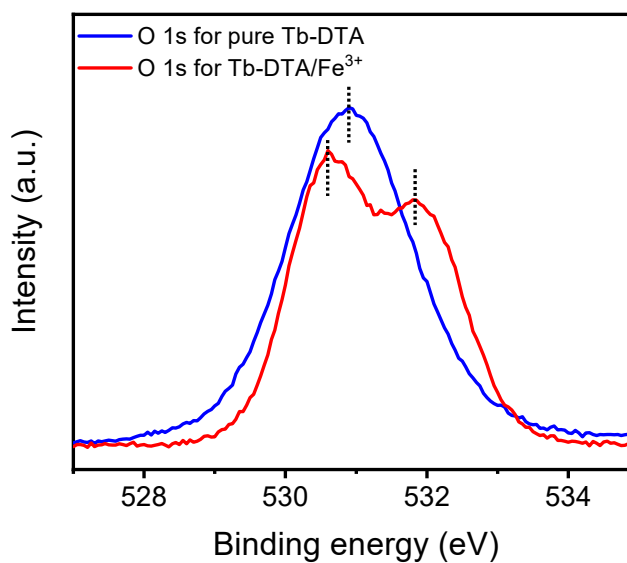

**Fig. S10.** O 1s spectra of the Eu-DTA (blue) and Fe<sup>3+</sup>-incorporated 1 (red) activated in DMF solution of Fe(NO<sub>3</sub>)<sub>3</sub>.



**Table S3.** The quenching efficiencies table of selected luminescent MOFs materials for nitroaromatics.

| Samples                                                                                                                           | Quenching efficiencies | References                                 |
|-----------------------------------------------------------------------------------------------------------------------------------|------------------------|--------------------------------------------|
| Eu-DTA                                                                                                                            | 96.5%                  | Our work                                   |
| Tb-DTA                                                                                                                            | 91.5%                  |                                            |
| $\{\text{Eu}(\text{L})(\text{BPDC})_{1/2}(\text{NO}_3)\cdot\text{H}_2\text{O}\}_n$                                                | 98.35%                 | ACS Appl. Mater. Interfaces                |
| $\{\text{Tb}(\text{L})(\text{BPDC})_{1/2}(\text{NO}_3)\cdot\text{H}_2\text{O}\}_n$                                                | 99.34%                 | 2017, 9, 1629-1634                         |
| $\{\text{Cd}_4(\text{HDDCP})_2(4,4'\text{-bibp})_2(\text{H}_2\text{O})_2\}\cdot 2.5(\text{DOA})\cdot 1.5(\text{H}_2\text{O})\}_n$ | 95.2%                  | CrystEngComm, 2020, 22,                    |
| $\{\text{Cd}_2(\text{HDDCP})(1,4\text{-bib})(\text{H}_2\text{O})\}\cdot\text{H}_2\text{O}\}_n$                                    | 82.3%                  | 6927-6934                                  |
| $\{\text{Cd}_2(\text{L})(\text{DMA})\}\cdot\text{H}_2\text{N}(\text{Me})_2\}_n$                                                   | 99%                    | CrystEngComm, 2018, 20, 477-486            |
| $[(\text{CH}_3)_2\text{NH}_2]_2 [\text{In}_2(\text{H}_3\text{L})_2(\text{OX})]\cdot 3\text{DMF}\cdot 2\text{H}_2\text{O}$         | 86.4%                  | J. Solid. State. Chem., 2021, 302, 122424. |
| $[\text{Eu}(\text{HL})_3(\text{CH}_3\text{OH})_2]_n$                                                                              | 90%                    | Cryst. Growth Des., 2017, 17, 3907-3916    |
